# Supplementary material for: Receptor Elimination by E3 Ubiquitin Ligase Recruitment (REULR): A Targeted Protein Degradation Toolbox
Source: PubMed Central journal article supplement (PMC10127277; doi:10.1021/acssynbio.2c00587), 2023-04-03
Supplement: sb2c00587_si_001.pdf [file sb2c00587_si_001.pdf]

## Supporting Information

### Receptor Elimination by E3 Ubiquitin Ligase Recruitment (REULR): A Targeted Protein Degradation Toolbox.

Dirk H. Siepe<sup>1</sup>, Lora K. Picton<sup>1</sup>, K. Christopher Garcia<sup>1,2,3\*</sup>

<sup>1</sup>Department of Molecular and Cellular Physiology, Stanford University School of Medicine, Stanford, CA 94305, USA.

<sup>2</sup>Department of Structural Biology, Stanford University School of Medicine, Stanford, CA 94305, USA.

<sup>3</sup>Howard Hughes Medical Institute, Stanford University School of Medicine, Stanford, CA 94305, USA.

\*Lead Contact. [kcgarcia@stanford.edu](mailto:kcgarcia@stanford.edu)

# Figure S1

**A**

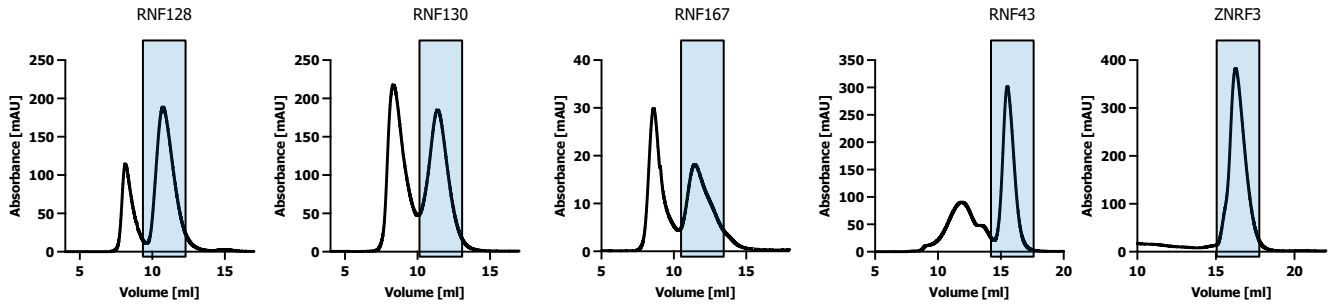

**B**

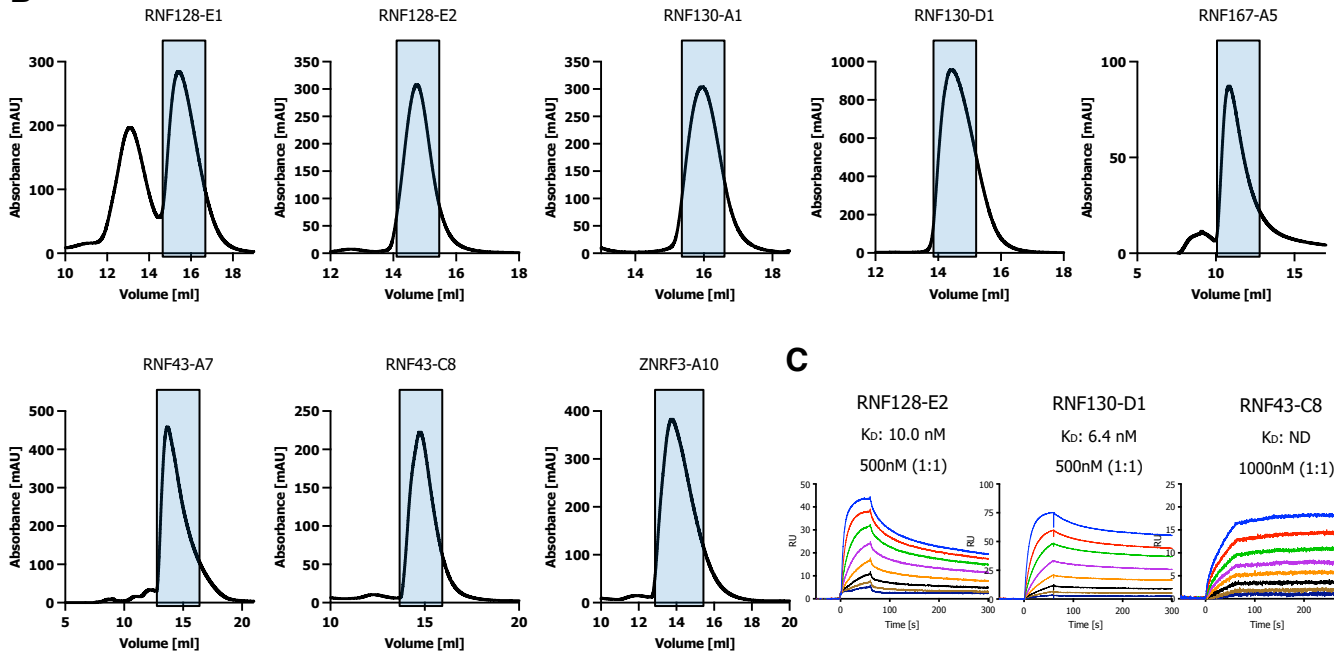

**C**

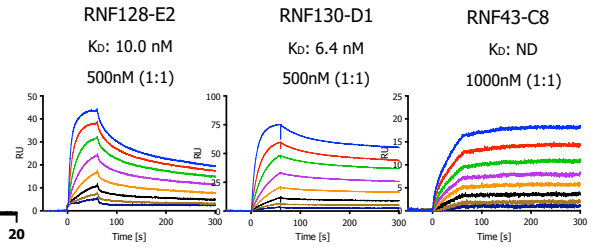

**D**

| Human/Mouse Similarity | Identity     | Gaps         |             |
|------------------------|--------------|--------------|-------------|
| RNF128                 | 97.95        | 96.15        | 0.00        |
| RNF130                 | 99.74        | 98.72        | 0.00        |
| RNF167                 | 96.3         | 93.83        | 0.62        |
| RNF43                  | 95.98        | 91.38        | 0.00        |
| ZNRF3                  | 98.78        | 98.17        | 0.00        |
| <b>Average [%]</b>     | <b>97.75</b> | <b>95.65</b> | <b>0.12</b> |

## Figure S1

### Figure S1. Size-Exclusion Chromatography, SPR sensograms and pairwise sequence alignments.

(A, B) Size-Exclusion Chromatography traces of RNF128, RNF130, RNF167, RNF43 and ZNRF3 PA-TM-RING E3 Ligase ECDs used for screening the synthetic nanobody library and SPR validation of PA-TM-RING E3 Ligase VHHs. (C) SPR sensograms and binding affinities of PA-TM-RING ligase selected nanobodies (analytes) for human RNF128, RNF130 and RNF43 ECDs (ligands). (D) Pairwise protein sequence alignments of PA-TM-RING E3 Ligases were performed using Smith-Waterman algorithm to calculate alignments between human and mouse amino acid sequences.

# Figure S2

**A**

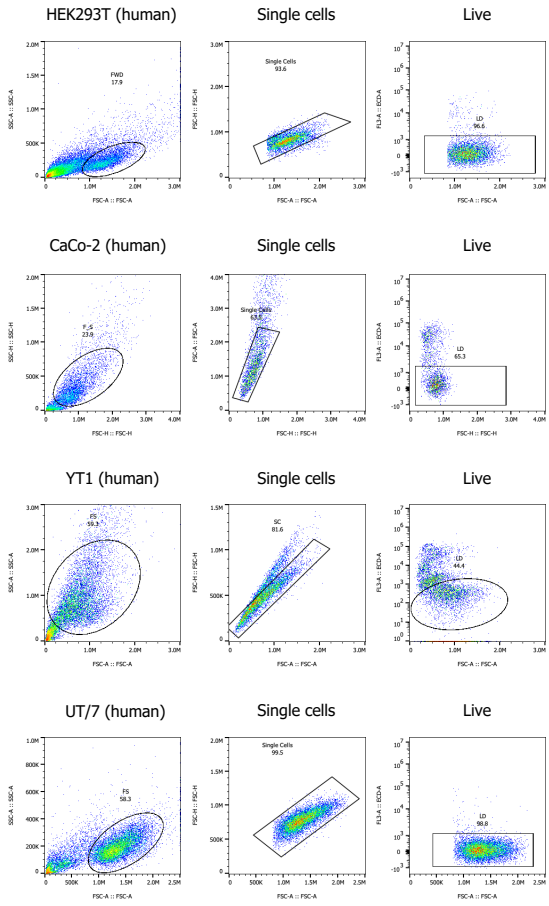

**B**

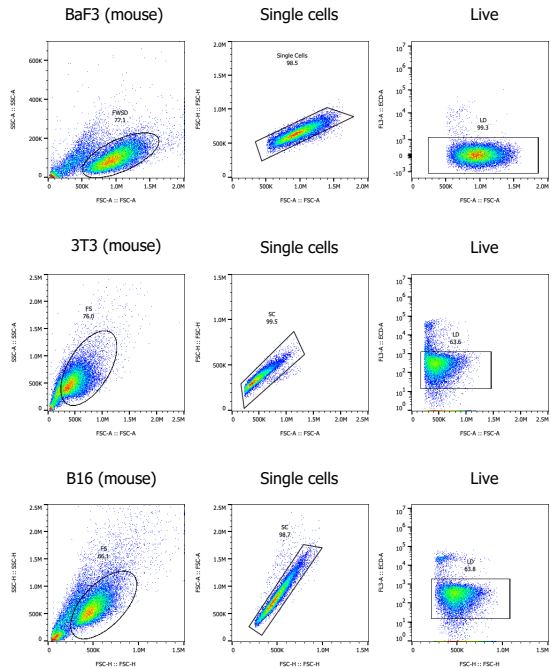

**C**

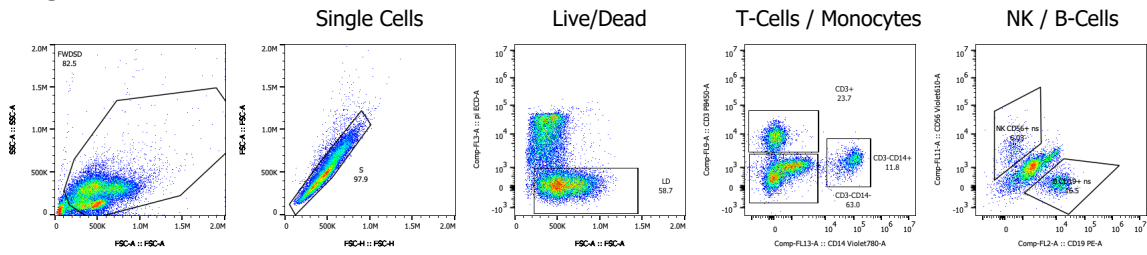

## Figure S2

### Figure S2. Cell Surface Staining Gating strategies.

(A) Gating strategy of human HEK293T, CaCo-2, YT1, UT/7 cell lines. (B) Gating strategy of mouse BaF3, 3T3, B16 cell lines. (C) Gating strategy of Primary Peripheral Blood Mononuclear Cells (PBMCs).

# Figure S3

**A**

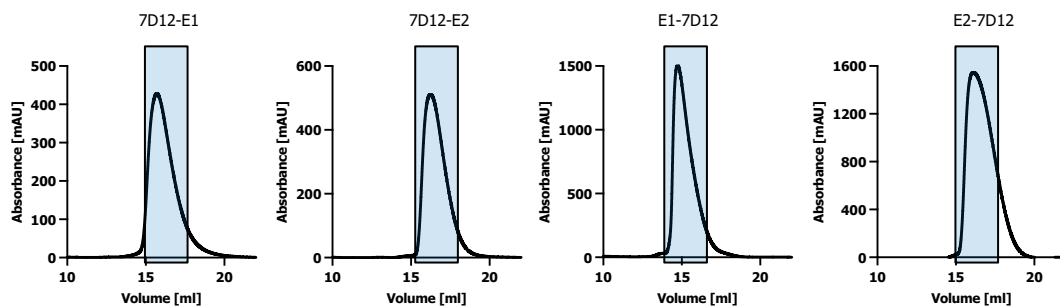

**B**

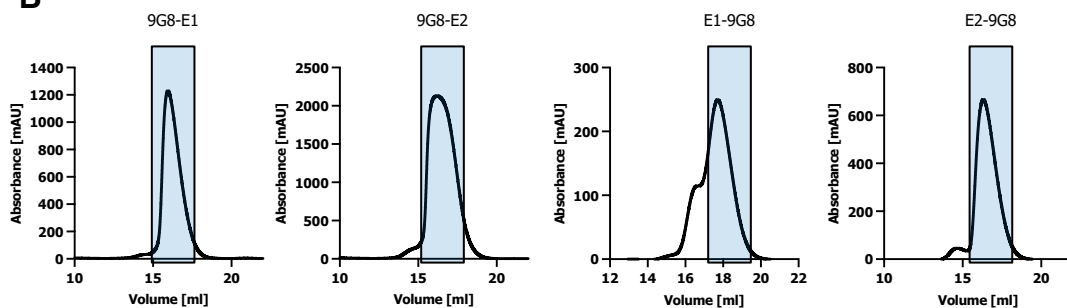

**C**

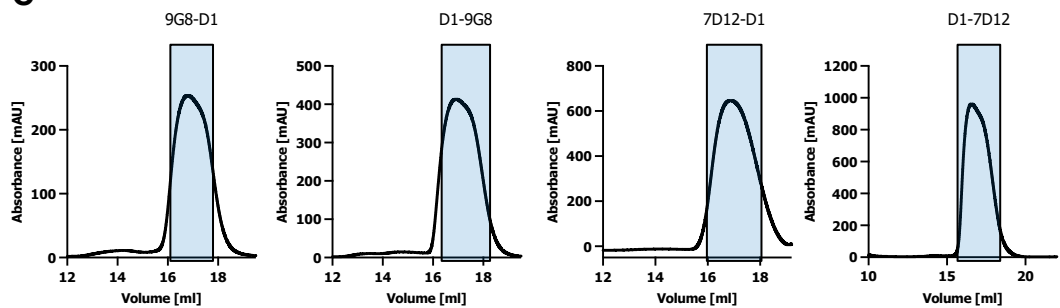

**D**

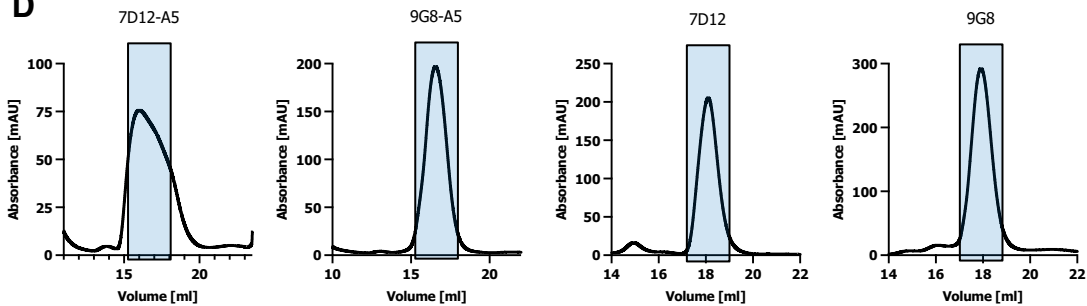

## Figure S3

### Figure S3. Size-Exclusion Chromatography.

(A-D) Size-Exclusion Chromatography traces of proteins used for EGFR-REULR experiments.

# Figure S4

A

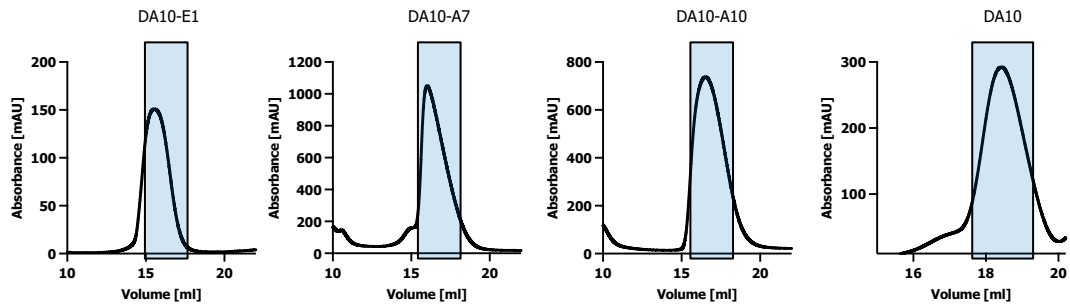



## Figure S4

### Figure S4. Size-Exclusion Chromatography.

(A) Size-Exclusion Chromatography traces of proteins used for EPOR-REULR experiments.

Figure S5

A

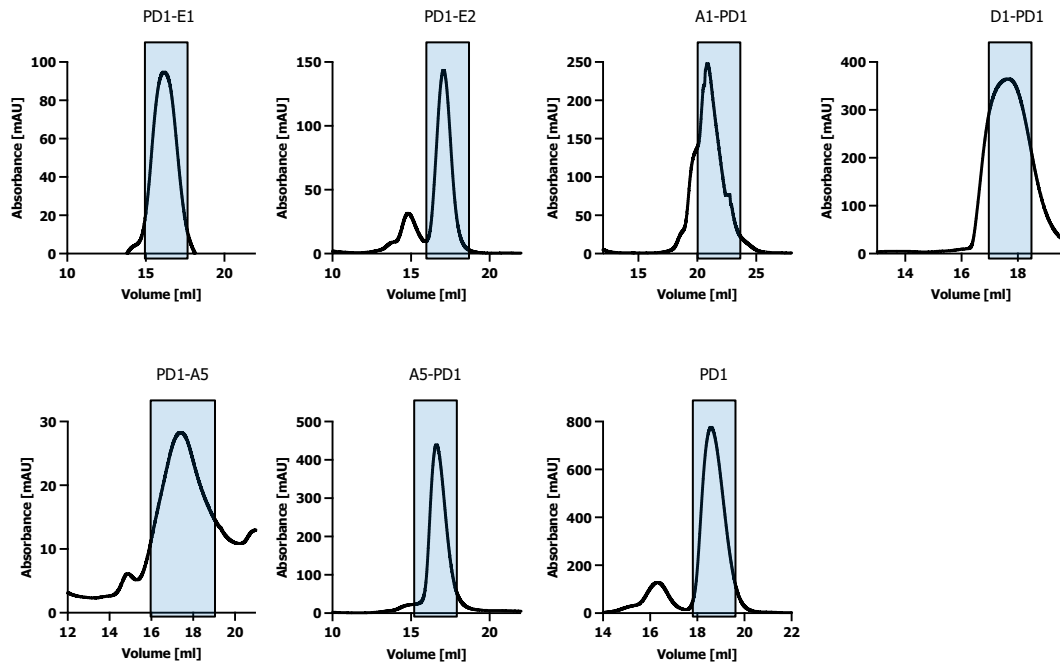

## Figure S5

### Figure S5. Size-Exclusion Chromatography.

(A) Size-Exclusion Chromatography traces of proteins used for PD1-REULR experiments.

# Figure S6

**A**

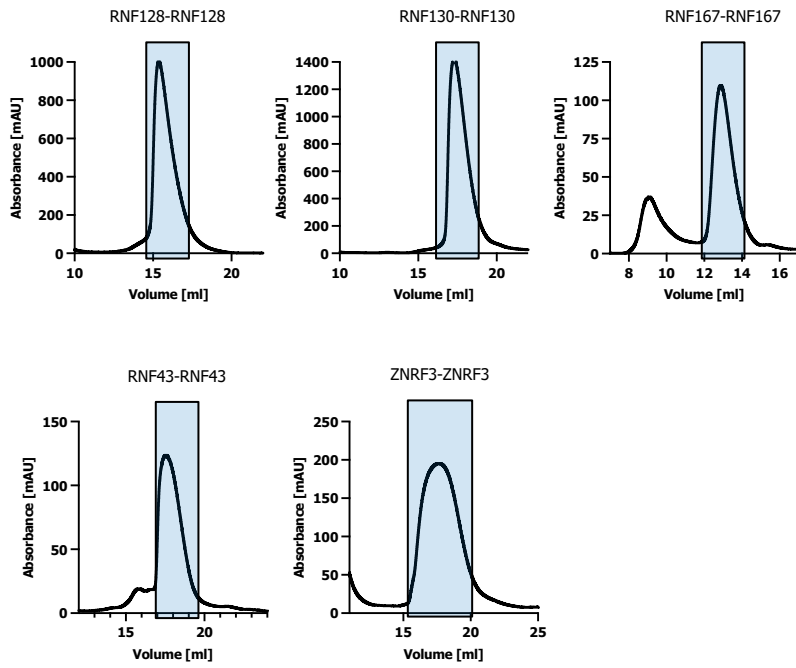

**B**

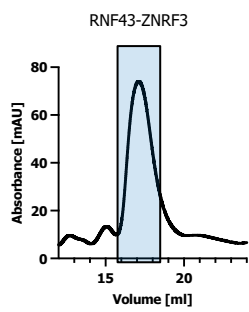

**C**

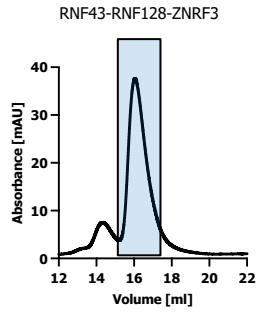

## Figure S6

### Figure S6. Size-Exclusion Chromatography.

(A-C) Size-Exclusion Chromatography traces of proteins used for Fratricide REULR experiments.

**Table S1****A**

| <b>Ligand (bio+)</b> | <b>Analyte (bio-)</b> | <b>Max Analyte (nM)</b> | <b>Dilution Series</b> | <b>Injection (sec)</b> | <b>Injection (ul/min)</b> | <b>Dissociation (sec)</b> | <b>Regeneration</b>         | <b>Regen (ul/min)</b> |
|----------------------|-----------------------|-------------------------|------------------------|------------------------|---------------------------|---------------------------|-----------------------------|-----------------------|
| RNF128 ECD           | RNF128 E1             | 500                     | 2                      | 60                     | 30                        | 240                       | 1 x 10 sec<br>Glycin pH 2.5 | 50                    |
| RNF128 ECD           | RNF128 E2             | 500                     | 2                      | 60                     | 30                        | 240                       | 1 x 10 sec<br>Glycin pH 2.5 | 50                    |
| RNF130 ECD           | RNF130 A1             | 500                     | 2                      | 60                     | 30                        | 240                       | 1 x 10 sec<br>Glycin pH 2.5 | 50                    |
| RNF130 ECD           | RNF130 D1             | 500                     | 2                      | 60                     | 30                        | 240                       | 1 x 10 sec<br>Glycin pH 2.5 | 50                    |
| RNF167 ECD           | RNF167 A5             | 1000                    | 2                      | 60                     | 30                        | 240                       | 1 x 10 sec<br>Glycin pH 2.5 | 50                    |
| RNF43 ECD            | RNF43 A7              | 1000                    | 2                      | 60                     | 30                        | 240                       | 1 x 10 sec<br>Glycin pH 2.5 | 50                    |
| RNF43 ECD            | RNF43 C8              | 1000                    | 2                      | 60                     | 30                        | 240                       | 1 x 10 sec<br>Glycin pH 2.5 | 50                    |
| ZNRF3 ECD            | ZNRF3 A10             | 125                     | 2                      | 60                     | 30                        | 240                       | 1 x 10 sec<br>Glycin pH 2.5 | 50                    |

# Table S1

## Table S1. SPR Conditions.

(A) Table of SPR conditions for all ligand-analyte pairs tested including ligand RU, maximum analyte concentration, analyte RU at maximum concentration, injection time (seconds), injection rate (ul/minute), dissociation time (seconds) and regeneration conditions.

# Table S2

## A

| NAME      | TYPE | FORMAT  | DESIGN | AA SEQUENCE                                                                                                                                                                                                                                                    | #   |
|-----------|------|---------|--------|----------------------------------------------------------------------------------------------------------------------------------------------------------------------------------------------------------------------------------------------------------------|-----|
| RNF128-E1 | VHH  | Monomer | RNF128 | QVQLQESGGGLVQAGGSLRLSCAASGNISVQLDMGWYRQAPGKEREFVAAINQGTITTYADSVKGRFTISR<br>DNAKNTVYLMQNSLKPEDTAVYYCAVYLYDIWNHPYWGQGTQVTVSS                                                                                                                                     | 118 |
| RNF128-E2 | VHH  | Monomer | RNF128 | QVQLQESGGGLVQAGGSLRLSCAASGSISGGKGMGWYRQAPGKEREFVAIIGSgaiTYADSVKGRFTISR<br>DNAKNTVYLMQNSLKPEDTAVYYCAVYTTALDEYPYWGQGTQVTVSS                                                                                                                                      | 118 |
| RNF130-A1 | VHH  | Monomer | RNF130 | QVQLQESGGGLVQAGGSLRLSCAASGYISGYVYMGWYRQAPGKEREFVASISYGASTYYADSVKGRFTISR<br>DNAKNTVYLMQNSLKPEDTAVYYCAVDFDSNYAHTYWGQGTQVTVSS                                                                                                                                     | 118 |
| RNF130-D1 | VHH  | Monomer | RNF130 | QVQLQESGGGLVQAGGSLRLSCAASGTISFIGYMGWYRQAPGKERELVASIASGTSTYYADSVKGRFTISR<br>NAKNTVYLMQNSLKPEDTAVYYCAATQYIQDVHRYWGQGTQVTVSS                                                                                                                                      | 118 |
| RNF167-A5 | VHH  | Monomer | RNF167 | QVQLQESGGGLVQAGGSLRLSCAASGSIFRLWYMGWYRQAPGKEREFVASIGIGATTNYADSVKGRFTISR<br>DNAKNTVYLMQNSLKPEDTAVYYCAVFGWAYSGYHDDFLYWGQGTQVTVSS                                                                                                                                 | 122 |
| RNF43-A7  | VHH  | Monomer | RNF43  | QVQLQESGGGLVQAGGSLRLSCAASGTIFGLSDMGWYRQAPGKEREFVAAIAGGTITTYADSVKGRFTISR<br>DNAKNTVYLMQNSLKPEDTAVYYCAAYKYDERYHSYWGQGTQVTVSS                                                                                                                                     | 118 |
| RNF43-C8  | VHH  | Monomer | RNF43  | QVQLQESGGGLVQAGGSLRLSCAASGSIFWKPVMGWYRQAPGKEREFVAAITSGTNTTYADSVKGRFTISR<br>DNAKNTVYLMQNSLKPEDTAVYYCAVDDYDVVEYPYWGQGTQVTVSS                                                                                                                                     | 118 |
| ZNRF-A10  | VHH  | Monomer | ZNRF3  | QVQLQESGGGLVQAGGSLRLSCAASGTISYAHIMGWYRQAPGKERELVAGISQGSITNYADSVKGRFTISR<br>SRDNAKNTVDLQMSLKPEDTAVYYCAVISYDIKSVPFYWGQGTQVTVSS                                                                                                                                   | 121 |
| 7D12      | VHH  | Monomer | EGFR   | QVKLEESGGGSVQTGGSLRLTCAASGRTRSRYGMWFRQAPGKEREFVSGISWRGDSTGYADSVKGRFTI<br>SRDNAKNTVDLQMSLKPEDTAVYYCAAAAGSAWYGTLYEYDYWGQGTQVTVSS                                                                                                                                 | 124 |
| 9G8       | VHH  | Monomer | EGFR   | EVQLVESGGGLVQAGGSLRLSCAASGRTFSSYAMGWFRQAPGKEREFVAINWSSGSTYYADSVKGRFTI<br>SRDNAKNTMYLQMSLKPEDTAVYYCAAGYQINSNGYNFKDYEYDYWGQGTQVTVSS                                                                                                                              | 127 |
| DA10      | scFv | Monomer | EPOR   | EVQLLESVGGGLVQPGGSLRLSCAASGFTFSSYAMSWFRQAPGKLEWVSAISGGGSGTYADSVKGRFTIS<br>RDNSKNTLYLQMSLRAEDTAVYYCVKDRVAVAGKGSYYFDSWGRGTTVTVSSGGGGGGGGGGGGGS<br>QSVLTQPPSVSEAPGQRVTIACSGSSSNIGNNAVSWYQQLPGKAPTLIIYDNLPSGVSDRFSGSKSGTSA<br>SLAISGLQSEADYYCAAWDDSLNDWVFGGGTKVTVL | 249 |
| PD1       | VHH  | Monomer | PD1    | DVQLVESGGGVVQPGGSLRLSCAASGSIASIHAMGWFRQAPGKEREFVAVITWSSGITYYADSVKGRFTISR<br>DNSKNTVYLMQNSLRPEDTALYYCAGDKHQSSWYDYWGQGTQVTVSS                                                                                                                                    | 119 |



# Table S2

## B

| NAME    | TYPE    | FORMAT | DESIGN      | AA SEQUENCE                                                                                                                                                                                                                                                                   | #   |
|---------|---------|--------|-------------|-------------------------------------------------------------------------------------------------------------------------------------------------------------------------------------------------------------------------------------------------------------------------------|-----|
| 7D12-E1 | VHH-VHH | Dimer  | EGFR-RNF128 | QVKLEESGGGSVQTGGSLRLTCAASGRTRSRSYGMGWFRQAPGKEREFVSGISWRGDSTGYADSVKGRFTI<br>SRDNAKNTVDLQMNLSLKPEDTAIYYCAAAGSAWYGTLYEYDYWGQGTQVTVSSLEVLFGQPQVQLQESG<br>GGLVQAGGSLRLSACAASGNISVQLDMGWYRQAPGKEREFVAAINQGGTTTTYYADSVKGRFTISRDNAKNTVY<br>LQMNLSLKPEDTAIYYCAVYLYDIWNHPYWGQGTQVTVSS   | 250 |
| 7D12-E2 | VHH-VHH | Dimer  | EGFR-RNF128 | QVKLEESGGGSVQTGGSLRLTCAASGRTRSRSYGMGWFRQAPGKEREFVSGISWRGDSTGYADSVKGRFTI<br>SRDNAKNTVDLQMNLSLKPEDTAIYYCAAAGSAWYGTLYEYDYWGQGTQVTVSSLEVLFGQPQVQLQESG<br>GGLVQAGGSLRLSACAASGISGGKGMGWYRQAPGKEREFVAAIGSGAITYYADSVKGRFTISRDNAKNTVY<br>LQMNLSLKPEDTAIYYCAVYTTALDEYPYWGQGTQVTVSS      | 250 |
| E1-7D12 | VHH-VHH | Dimer  | EGFR-RNF128 | QVQLQESGGGLVQAGGSLRLSACAASGNISVQLDMGWYRQAPGKEREFVAAINQGGTTTTYYADSVKGRFTISR<br>DNAKNTVYLMNLSLKPEDTAIYYCAVYLYDIWNHPYWGQGTQVTVSSLEVLFGQPQVQLQESGGGSVQTG<br>GSLRLTCAASGRTRSRSYGMGWFRQAPGKEREFVSGISWRGDSTGYADSVKGRFTISRDNAKNTVDLQMN<br>LKPEDTAIYYCAAAGSAWYGTLYEYDYWGQGTQVTVSS      | 250 |
| E2-7D12 | VHH-VHH | Dimer  | EGFR-RNF128 | QVQLQESGGGLVQAGGSLRLSACAASGISGGKGMGWYRQAPGKEREFVAAIGSGAITYYADSVKGRFTISR<br>DNAKNTVYLMNLSLKPEDTAIYYCAVYTTALDEYPYWGQGTQVTVSSLEVLFGQPQVQLQESGGGSVQTG<br>GSLRLTCAASGRTRSRSYGMGWFRQAPGKEREFVSGISWRGDSTGYADSVKGRFTISRDNAKNTVDLQMN<br>LKPEDTAIYYCAAAGSAWYGTLYEYDYWGQGTQVTVSS         | 250 |
| 9G8-E1  | VHH-VHH | Dimer  | EGFR-RNF128 | EVQLVESGGGLVQAGGSLRLSACAASGRTFSSYAMGWFRQAPGKEREFVAINWSSGSTYYADSVKGRFTI<br>SRDNAKNTMYLQMNLSLKPEDTAIYYCAAGYQINSGNYNFKDYEYDYWGQGTQVTVSSLEVLFGQPQVQLQ<br>ESGGGLVQAGGSLRLSACAASGNISVQLDMGWYRQAPGKEREFVAAINQGGTTTTYYADSVKGRFTISRDNAK<br>NTVYLMNLSLKPEDTAIYYCAVYLYDIWNHPYWGQGTQVTVSS | 253 |
| 9G8-E2  | VHH-VHH | Dimer  | EGFR-RNF128 | EVQLVESGGGLVQAGGSLRLSACAASGRTFSSYAMGWFRQAPGKEREFVAINWSSGSTYYADSVKGRFTI<br>SRDNAKNTMYLQMNLSLKPEDTAIYYCAAGYQINSGNYNFKDYEYDYWGQGTQVTVSSLEVLFGQPQVQLQ<br>ESGGGLVQAGGSLRLSACAASGISGGKGMGWYRQAPGKEREFVAAIGSGAITYYADSVKGRFTISRDNAK<br>NTVYLMNLSLKPEDTAIYYCAVYTTALDEYPYWGQGTQVTVSS    | 253 |
| E1-9G8  | VHH-VHH | Dimer  | EGFR-RNF128 | QVQLQESGGGLVQAGGSLRLSACAASGNISVQLDMGWYRQAPGKEREFVAAINQGGTTTTYYADSVKGRFTISR<br>DNAKNTVYLMNLSLKPEDTAIYYCAVYLYDIWNHPYWGQGTQVTVSSLEVLFGQPQVQLQESGGGLVQAG<br>GSLRLSACAASGRTFSSYAMGWFRQAPGKEREFVAINWSSGSTYYADSVKGRFTISRDNAKNTMYLQMN<br>LKPEDTAIYYCAAGYQINSGNYNFKDYEYDYWGQGTQVTVSS   | 253 |
| E2-9G8  | VHH-VHH | Dimer  | EGFR-RNF128 | QVQLQESGGGLVQAGGSLRLSACAASGISGGKGMGWYRQAPGKEREFVAAIGSGAITYYADSVKGRFTISR<br>DNAKNTVYLMNLSLKPEDTAIYYCAVYTTALDEYPYWGQGTQVTVSSLEVLFGQPQVQLQESGGGLVQAG<br>GSLRLSACAASGRTFSSYAMGWFRQAPGKEREFVAINWSSGSTYYADSVKGRFTISRDNAKNTMYLQMN<br>LKPEDTAIYYCAAGYQINSGNYNFKDYEYDYWGQGTQVTVSS      | 253 |
| 9G8-D1  | VHH-VHH | Dimer  | EGFR-RNF130 | EVQLVESGGGLVQAGGSLRLSACAASGRTFSSYAMGWFRQAPGKEREFVAINWSSGSTYYADSVKGRFTI<br>SRDNAKNTMYLQMNLSLKPEDTAIYYCAAGYQINSGNYNFKDYEYDYWGQGTQVTVSSLEVLFGQPQVQLQ<br>ESGGGLVQAGGSLRLSACAASGTISFIGYMGWYRQAPGKERELVASIASGTSTYYADSVKGRFTISRDNAK<br>NTVYLMNLSLKPEDTAIYYCAATQYIQDVHRYWGQGTQVTVSS   | 253 |
| D1-9G8  | VHH-VHH | Dimer  | EGFR-RNF130 | QVQLQESGGGLVQAGGSLRLSACAASGTISFIGYMGWYRQAPGKERELVASIASGTSTYYADSVKGRFTISR<br>DNAKNTVYLMNLSLKPEDTAIYYCAATQYIQDVHRYWGQGTQVTVSSLEVLFGQPQVQLQESGGGLVQAGG<br>SLRLSACAASGRTFSSYAMGWFRQAPGKEREFVAINWSSGSTYYADSVKGRFTISRDNAKNTMYLQMN<br>LKPEDTAIYYCAAGYQINSGNYNFKDYEYDYWGQGTQVTVSS     | 253 |
| 7D12-D1 | VHH-VHH | Dimer  | EGFR-RNF130 | QVKLEESGGGSVQTGGSLRLTCAASGRTRSRSYGMGWFRQAPGKEREFVSGISWRGDSTGYADSVKGRFTI<br>SRDNAKNTVDLQMNLSLKPEDTAIYYCAAAGSAWYGTLYEYDYWGQGTQVTVSSLEVLFGQPQVQLQESG<br>GGLVQAGGSLRLSACAASGTISFIGYMGWYRQAPGKERELVASIASGTSTYYADSVKGRFTISRDNAKNTVY<br>LQMNLSLKPEDTAIYYCAATQYIQDVHRYWGQGTQVTVSS     | 250 |
| D1-7D12 | VHH-VHH | Dimer  | EGFR-RNF130 | QVQLQESGGGLVQAGGSLRLSACAASGTISFIGYMGWYRQAPGKERELVASIASGTSTYYADSVKGRFTISR<br>DNAKNTVYLMNLSLKPEDTAIYYCAATQYIQDVHRYWGQGTQVTVSSLEVLFGQPQVQLQESGGGSVQTG<br>SLRLTCAASGRTRSRSYGMGWFRQAPGKEREFVSGISWRGDSTGYADSVKGRFTISRDNAKNTVDLQMN<br>LKPEDTAIYYCAAGYQINSGNYNFKDYEYDYWGQGTQVTVSS     | 250 |
| 7D12-A5 | VHH-VHH | Dimer  | EGFR-RNF167 | QVKLEESGGGSVQTGGSLRLTCAASGRTRSRSYGMGWFRQAPGKEREFVSGISWRGDSTGYADSVKGRFTI<br>SRDNAKNTVDLQMNLSLKPEDTAIYYCAAAGSAWYGTLYEYDYWGQGTQVTVSSLEVLFGQPQVQLQESG<br>GGLVQAGGSLRLSACAASGSIFRLWYMGWYRQAPGKEREFVASIGATTNYADSVKGRFTISRDNAKNTVY<br>LQMNLSLKPEDTAIYYCAVFGWAYSGYHDDFLYWGQGTQVTVSS   | 254 |
| 9G8-A5  | VHH-VHH | Dimer  | EGFR-RNF167 | EVQLVESGGGLVQAGGSLRLSACAASGRTFSSYAMGWFRQAPGKEREFVAINWSSGSTYYADSVKGRFTI<br>SRDNAKNTMYLQMNLSLKPEDTAIYYCAAGYQINSGNYNFKDYEYDYWGQGTQVTVSSLEVLFGQPQVQLQ<br>ESGGGLVQAGGSLRLSACAASGSIFRLWYMGWYRQAPGKEREFVASIGATTNYADSVKGRFTISRDNAK<br>NTVYLMNLSLKPEDTAIYYCAVFGWAYSGYHDDFLYWGQGTQVTVSS | 257 |

# Table S2

## C

| NAME      | TYPE        | FORMAT | DESIGN                 | AA SEQUENCE                                                                                                                                                                                                                                                                                                                                                                                                   | #   |
|-----------|-------------|--------|------------------------|---------------------------------------------------------------------------------------------------------------------------------------------------------------------------------------------------------------------------------------------------------------------------------------------------------------------------------------------------------------------------------------------------------------|-----|
| DA10-E1   | scFv-VHH    | Dimer  | EPOR-RNF128            | EVQLLESGGGLVQPGGSLRLSCAASGFTFSSYAMSWVRQAPGKLEWVSAISGGGGSTYYADSVKGRFTIS<br>RDNSKNTLYLQMNSLRAEDTAVYYCVKDRVAVAGKGSYFDSWGRGTTVTVSSGGGGSGGGGGSGGGGS<br>QSVLTQPPSVSEAPGQRVTIACSGSSNIGNNAVSWYQQLPGKAPTLIIYDNLPSGVSDRFSGSKSGTSA<br>SLAISGLQSEDEADYYCAAWDDSLNDWVFGGGTKVTVLVQVQLQESGGGLVQAGGSLRLSCAASGNISVQL<br>DMGWYRQAPGKEREFVAAINQGGTTTTYADSVKGRFTISRDNKNTVYLQMNSLKPEDTAVYYCAVYLDIWI<br>NHPYWGQGTQVTVSS              | 367 |
| DA10-A7   | scFv-VHH    | Dimer  | EPOR-RNF43             | EVQLLESGGGLVQPGGSLRLSCAASGFTFSSYAMSWVRQAPGKLEWVSAISGGGGSTYYADSVKGRFTIS<br>RDNSKNTLYLQMNSLRAEDTAVYYCVKDRVAVAGKGSYFDSWGRGTTVTVSSGGGGSGGGGGSGGGGS<br>QSVLTQPPSVSEAPGQRVTIACSGSSNIGNNAVSWYQQLPGKAPTLIIYDNLPSGVSDRFSGSKSGTSA<br>SLAISGLQSEDEADYYCAAWDDSLNDWVFGGGTKVTVL                                                                                                                                             | 249 |
| DA10-A10  | scFv-VHH    | Dimer  | EPOR-ZNRF3             | EVQLLESGGGLVQPGGSLRLSCAASGFTFSSYAMSWVRQAPGKLEWVSAISGGGGSTYYADSVKGRFTIS<br>RDNSKNTLYLQMNSLRAEDTAVYYCVKDRVAVAGKGSYFDSWGRGTTVTVSSGGGGSGGGGGSGGGGS<br>QSVLTQPPSVSEAPGQRVTIACSGSSNIGNNAVSWYQQLPGKAPTLIIYDNLPSGVSDRFSGSKSGTSA<br>SLAISGLQSEDEADYYCAAWDDSLNDWVFGGGTKVTVL                                                                                                                                             | 249 |
| PD1-E1    | VHH-VHH     | Dimer  | PD1-RNF128             | DVQLVESGGGVVQPGGSLRLSCAASGSIASIHAMGWFRQAPGKEREFVAVITWSSGITYYADSVKGRFTISR<br>DNSKNTVYLQMNSLRPEDTALYYCAGDKHQSSWYDYWGQGTQVTVSSLEVLVQFGPQVQLQESGGGLVQA<br>GGSLRLSCAASGNISVQLDMGWYRQAPGKEREFVAAINQGGTTTTYADSVKGRFTISRDNKNTVYLQMNSL<br>KPEDTAVYYCAVYLDIWIHNHPYWGQGTQVTVSS                                                                                                                                           | 245 |
| PD1-E2    | VHH-VHH     | Dimer  | PD1-RNF128             | DVQLVESGGGVVQPGGSLRLSCAASGSIASIHAMGWFRQAPGKEREFVAVITWSSGITYYADSVKGRFTISR<br>DNSKNTVYLQMNSLRPEDTALYYCAGDKHQSSWYDYWGQGTQVTVSSLEVLVQFGPQVQLQESGGGLVQA<br>GGSLRLSCAASGSIISGKGMGWYRQAPGKEREFVAAIGSGAITYYADSVKGRFTISRDNKNTVYLQMNSL<br>KPEDTAVYYCAVYTTALDEYPYWGQGTQVTVSS                                                                                                                                             | 245 |
| A1-PD1    | VHH-VHH     | Dimer  | PD1-RNF130             | VQVQLQESGGGLVQAGGSLRLSCAASGYSISGYVMGWYRQAPGKEREFVAVITWSSGITYYADSVKGRFTISR<br>DNSKNTVYLQMNSLRPEDTAVYYCAVDFDSNYAHTYWGQGTQVTVSSLEVLVQFGPQVQLVESGGGVVQPG<br>GSLRLSCAASGSIASIHAMGWFRQAPGKEREFVAVITWSSGITYYADSVKGRFTISRDNKNTVYLQMNSLR<br>PEDTALYYCAGDKHQSSWYDYWGQGTQVTVSS                                                                                                                                           | 245 |
| D1-PD1    | VHH-VHH     | Dimer  | PD1-RNF130             | VQVQLQESGGGLVQAGGSLRLSCAASGYSISGYVMGWYRQAPGKEREFVAVITWSSGITYYADSVKGRFTISR<br>DNSKNTVYLQMNSLRPEDTALYYCAGDKHQSSWYDYWGQGTQVTVSSLEVLVQFGPQVQLVESGGGLVQA<br>GGSLRLSCAASGSIASIHAMGWFRQAPGKEREFVAVITWSSGITYYADSVKGRFTISRDNKNTVYLQMNSLR<br>EDTALYYCAGDKHQSSWYDYWGQGTQVTVSS                                                                                                                                            | 245 |
| PD1-A5    | VHH-VHH     | Dimer  | PD1-RNF167             | DVQLVESGGGVVQPGGSLRLSCAASGSIASIHAMGWFRQAPGKEREFVAVITWSSGITYYADSVKGRFTISR<br>DNSKNTVYLQMNSLRPEDTALYYCAGDKHQSSWYDYWGQGTQVTVSSLEVLVQFGPQVQLQESGGGLVQA<br>GGSLRLSCAASGSIIFRLWYMGWYRQAPGKEREFVAVISIGATTNYADSVKGRFTISRDNKNTVYLQMNSLK<br>PEDTAVYYCAVFGWAYSGYHDDFLYWGQGTQVTVSS                                                                                                                                        | 249 |
| A5-PD1    | VHH-VHH     | Dimer  | PD1-RNF167             | VQVQLQESGGGLVQAGGSLRLSCAASGSIIFRLWYMGWYRQAPGKEREFVAVISIGATTNYADSVKGRFTISR<br>DNAKNTVYLQMNSLKPEDTAVYYCAVFGWAYSGYHDDFLYWGQGTQVTVSSLEVLVQFGPQVQLVESGGG<br>VQPGGSLRLSCAASGSIASIHAMGWFRQAPGKEREFVAVITWSSGITYYADSVKGRFTISRDNKNTVYLQ<br>MNSLRPEDTALYYCAGDKHQSSWYDYWGQGTQVTVSS                                                                                                                                        | 249 |
| E2-E2     | VHH-VHH     | Dimer  | RNF128-RNF128          | VQVQLQESGGGLVQAGGSLRLSCAASGSIISGKGMGWYRQAPGKEREFVAVISIGATTNYADSVKGRFTISR<br>DNAKNTVYLQMNSLKPEDTAVYYCAVYTTALDEYPYWGQGTQVTVSSGSLVLFQGGPQVQLQESGGGLV<br>VQAGGSLRLSCAASGSIISGKGMGWYRQAPGKEREFVAVISIGATTNYADSVKGRFTISRDNKNTVYLQ<br>MNSLRKPEDTAVYYCAVYTTALDEYPYWGQGTQVTVSS                                                                                                                                          | 248 |
| A1-A1     | VHH-VHH     | Dimer  | RNF130-RNF130          | VQVQLQESGGGLVQAGGSLRLSCAASGYSISGYVMGWYRQAPGKEREFVAVISIGATTNYADSVKGRFTISR<br>DNAKNTVYLQMNSLKPEDTAVYYCAVDFDSNYAHTYWGQGTQVTVSSLEVLVQFGPQVQLQESGGGLV<br>VQAGGSLRLSCAASGSIIFRLWYMGWYRQAPGKEREFVAVISIGATTNYADSVKGRFTISRDNKNTVYLQ<br>MNSLRKPEDTAVYYCAVDFDSNYAHTYWGQGTQVTVSS                                                                                                                                          | 248 |
| A5-A5     | VHH-VHH     | Dimer  | RNF167-RNF167          | VQVQLQESGGGLVQAGGSLRLSCAASGSIIFRLWYMGWYRQAPGKEREFVAVISIGATTNYADSVKGRFTISR<br>DNAKNTVYLQMNSLKPEDTAVYYCAVFGWAYSGYHDDFLYWGQGTQVTVSSGSLVLFQGGPQVQLQESGG<br>VQAGGSLRLSCAASGSIIFRLWYMGWYRQAPGKEREFVAVISIGATTNYADSVKGRFTISRDNKNTVYLQ<br>MNSLRKPEDTAVYYCAVFGWAYSGYHDDFLYWGQGTQVTVSS                                                                                                                                   | 256 |
| A7-A7     | VHH-VHH     | Dimer  | RNF43-RNF43            | VQVQLQESGGGLVQAGGSLRLSCAASGTFIFGLSDMGWYRQAPGKEREFVAAIAGGTITYYADSVKGRFTISR<br>DNAKNTVYLQMNSLKPEDTAVYYCAAYKYDERYHSYWGQGTQVTVSSGSLVLFQGGPQVQLQESGGGLV<br>QAGGSLRLSCAASGTFIFGLSDMGWYRQAPGKEREFVAAIAGGTITYYADSVKGRFTISRDNKNTVYLQMN<br>LKPEDTAVYYCAAYKYDERYHSYWGQGTQVTVSS                                                                                                                                           | 248 |
| A10-A10   | VHH-VHH     | Dimer  | ZNRF3-ZNRF3            | VQVQLQESGGGLVQAGGSLRLSCAASGTSIYAHIMGWYRQAPGKERELVAGISQGSITNYADSVKGRFTISR<br>DNAKNTVYLQMNSLKPEDTAVYYCAVISYDIKSVPFYRWGQGTQVTVSSGSLVLFQGGPQVQLQESGGG<br>LVQAGGSLRLSCAASGTSIYAHIMGWYRQAPGKERELVAGISQGSITNYADSVKGRFTISRDNKNTVYLQ<br>MNSLRKPEDTAVYYCAVISYDIKSVPFYRWGQGTQVTVSS                                                                                                                                       | 254 |
| C8-A10    | VHH-VHH     | Dimer  | RNF43-ZNRF3            | VQVQLQESGGGLVQAGGSLRLSCAASGSIIFWPKVMGWYRQAPGKEREFVAAITSGTNTYYADSVKGRFTISR<br>DNAKNTVYLQMNSLKPEDTAVYYCAVDDYDVVEYPYWGQGTQVTVSSGSLVLFQGGPQVQLQESGGG<br>LVQAGGSLRLSCAASGTSIYAHIMGWYRQAPGKERELVAGISQGSITNYADSVKGRFTISRDNKNTVYLQ<br>MNSLRKPEDTAVYYCAVISYDIKSVPFYRWGQGTQVTVSS                                                                                                                                        | 251 |
| C8-E2-A10 | VHH-VHH-VHH | Trimer | RNF43-RNF128-<br>ZNRF3 | VQVQLQESGGGLVQAGGSLRLSCAASGSIIFWPKVMGWYRQAPGKEREFVAAITSGTNTYYADSVKGRFTISR<br>DNAKNTVYLQMNSLKPEDTAVYYCAVDDYDVVEYPYWGQGTQVTVSSGSLVLFQGGPQVQLQESGGG<br>LVQAGGSLRLSCAASGSIISGKGMGWYRQAPGKEREFVAAIGSGAITYYADSVKGRFTISRDNKNTVYLQ<br>MNSLRKPEDTAVYYCAVYTTALDEYPYWGQGTQVTVSSGSLVLFQGGPQVQLQESGGGLVQAGGSLRLS<br>CAASGTSIYAHIMGWYRQAPGKERELVAGISQGSITNYADSVKGRFTISRDNKNTVYLQMNSLKPEDTAVY<br>YCAVISYDIKSVPFYRWGQGTQVTVSS | 381 |

## Table S2

### Table S2. REULR Sequences.

(A-C) Table of REULR format, architecture and amino acid sequences.
